# Supplementary material for: GSK3β regulates physiological migration of stem/progenitor cells via cytoskeletal rearrangement
Source: JCI journal article supplement (doi:10.1172/jci64149), 2013-03-08

## Supplementary Information

**Supplementary Figure 1: GSK3 $\beta$  expression in HSPCs.** (A) Representative histograms of GSK3 $\beta$  expression in Lin<sup>+</sup> cells, Lin<sup>-</sup>cKit<sup>+</sup> (LK) cells, Lin<sup>-</sup>Sca-1<sup>+</sup>cKit<sup>+</sup> (LSK) cells and CD34<sup>+</sup>Lin<sup>-</sup>Sca-1<sup>+</sup>cKit<sup>+</sup> (CD34<sup>+</sup>LSK) cells from the BM. Background represents staining with secondary antibody alone. (B) Mean Fluorescence Intensity (MFI) levels of GSK3 $\beta$  expression in LK cells, LSK cells and CD34<sup>+</sup>LSK cells at ZT5 (5 hrs after initiation of light) as compared to ZT13 (1 hr after initiation of darkness); n=3-5. \* p<0.05, \*\* p<0.01 between ZT5 and ZT13 time points.

**Supplementary Figure 2: Phospho-GSK3 $\beta$  expression in HSPCs.** Ser9-phosphorylated GSK3 $\beta$  (pS9-GSK3 $\beta$ ) or Tyr216-phosphorylated GSK3 $\beta$  (pY216-GSK3 $\beta$ ) expression levels (fold change or in histogram) in LK cells in the BM. (A) pS9-GSK3 $\beta$  and pY216-GSK3 $\beta$  expression at ZT5 as compared to ZT13; n=3-7. (B) pS9-GSK3 $\beta$  and pY216-GSK3 $\beta$  expression following administration of 10 mg/kg NE or PBS for 20 min; n=3. (C) pS9-GSK3 $\beta$  and pY216-GSK3 $\beta$  expression following stimulation or not with 200ng/ml CXCL12 for 30sec or 5min – representative histograms are shown; n=5. Background represents staining with secondary antibody alone. (D) pS9-GSK3 $\beta$  expression following administration of PBS or IGF-1 for 7 consecutive days, 5  $\mu$ g/mouse/day; n=4. (E) pS9-GSK3 $\beta$  and pY216-GSK3 $\beta$  expression following exposure in vitro to 100 ng/ml SCF for 4 hr; n=5. \* p<0.05, \*\* p<0.01 in comparison to control.

**Supplementary Figure 3: GSK3 $\beta$  inhibition reduces HSPC egress.** (A) Mice were injected once with 0.6 mg/kg BIO-A or equivalent DMSO, or injected twice with 0.6 mg/kg BIO-A or equivalent DMSO, 60 min and 30 min before administration of 10 mg/kg norepinephrine (NE). One hr post the last injection, mice were sacrificed and PB was obtained to measure circulating Lin<sup>-</sup>Sca-1<sup>+</sup>cKit<sup>+</sup> (LSK) cells (as shown in Figure 3A and B). Representative FACS dot plots are shown here (Sca-1<sup>+</sup>cKit<sup>+</sup> out of Lin<sup>-</sup> cells per million PB MNC). (B) Long-term repopulation assay by PB HSCs. Donor mice were treated with 0.6 mg/kg BIO-A or equivalent DMSO, and after 1 hr, the PB was collected. Congenic recipient mice were lethally irradiated (1000 rad) 24hr prior to transplantation. Each recipient mouse was transplanted with 500  $\mu$ l of donor PB together with 200x10<sup>3</sup> host-type competitive BM cells. Donor chimerism in the recipient BM was evaluated 4 months following transplantation (as shown in Figure 2H). Representative FACS dot plots are shown here, where CD45.1 marks the host leukocytes and CD45.2 marks the donor leukocytes. (C) Mice were injected with 10 mg/kg PQ401 (IGF-1R antagonist), together with 0.6 mg/kg BIO-A or equivalent DMSO. After 1hr, mice were sacrificed and PB was obtained to

measure circulating LSK cells (as shown in Figure 5C). Representative FACS dot plots are shown here (Sca-1<sup>+</sup>cKit<sup>+</sup> out of Lin<sup>-</sup> cells per million PB MNC).

**Supplementary Figure 4: GSK3 $\beta$  inhibition does not affect HSPC frequencies in the BM.**

Mice were treated with 0.6 mg/kg BIO-A, 10 mg/kg PQ401 (IGF-1R antagonist), combination of both or equivalent DMSO. After 1hr, they were sacrificed and BM was obtained to measure colony-forming unit cells (CFU-C) (A) and LSK cells (B); n=6-8. NS – non-significant.

**Supplementary Figure 5: Actin polarization in CD34<sup>+</sup>LSK cells.**

Actin polarization was assessed in fixed/permeabilized Lin<sup>-</sup> cells using Phalloidin-FITC as described in Figure 7. Representative flow-cytometry-based single cells images of CD34<sup>+</sup>LSK cells as obtained by ImageStream. An asterisk points at a cell protrusion in response to CXCL12 stimuli. Original magnification x600.

**Supplementary Figure 1**

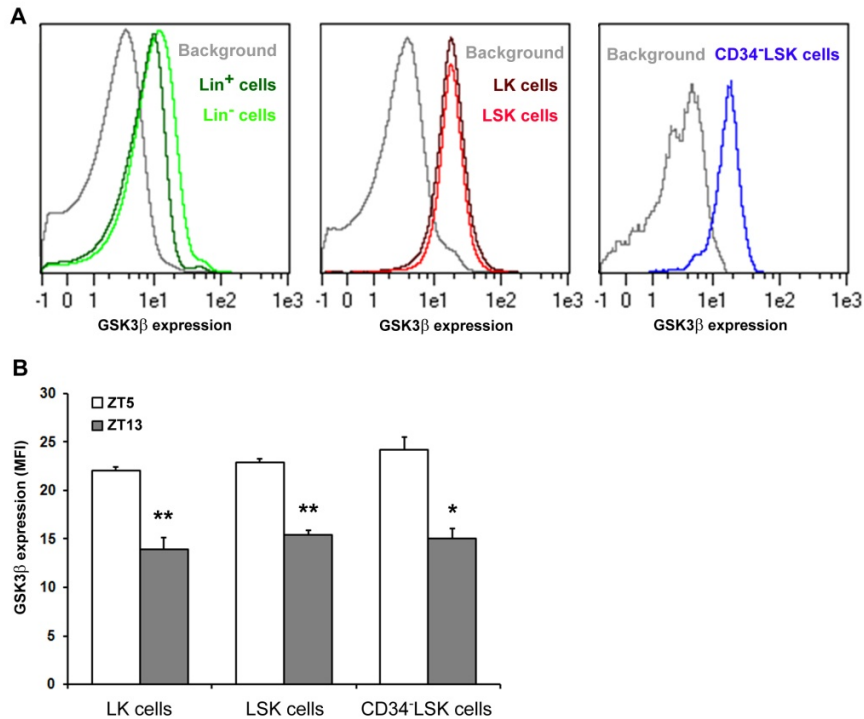

# Supplementary Figure 2

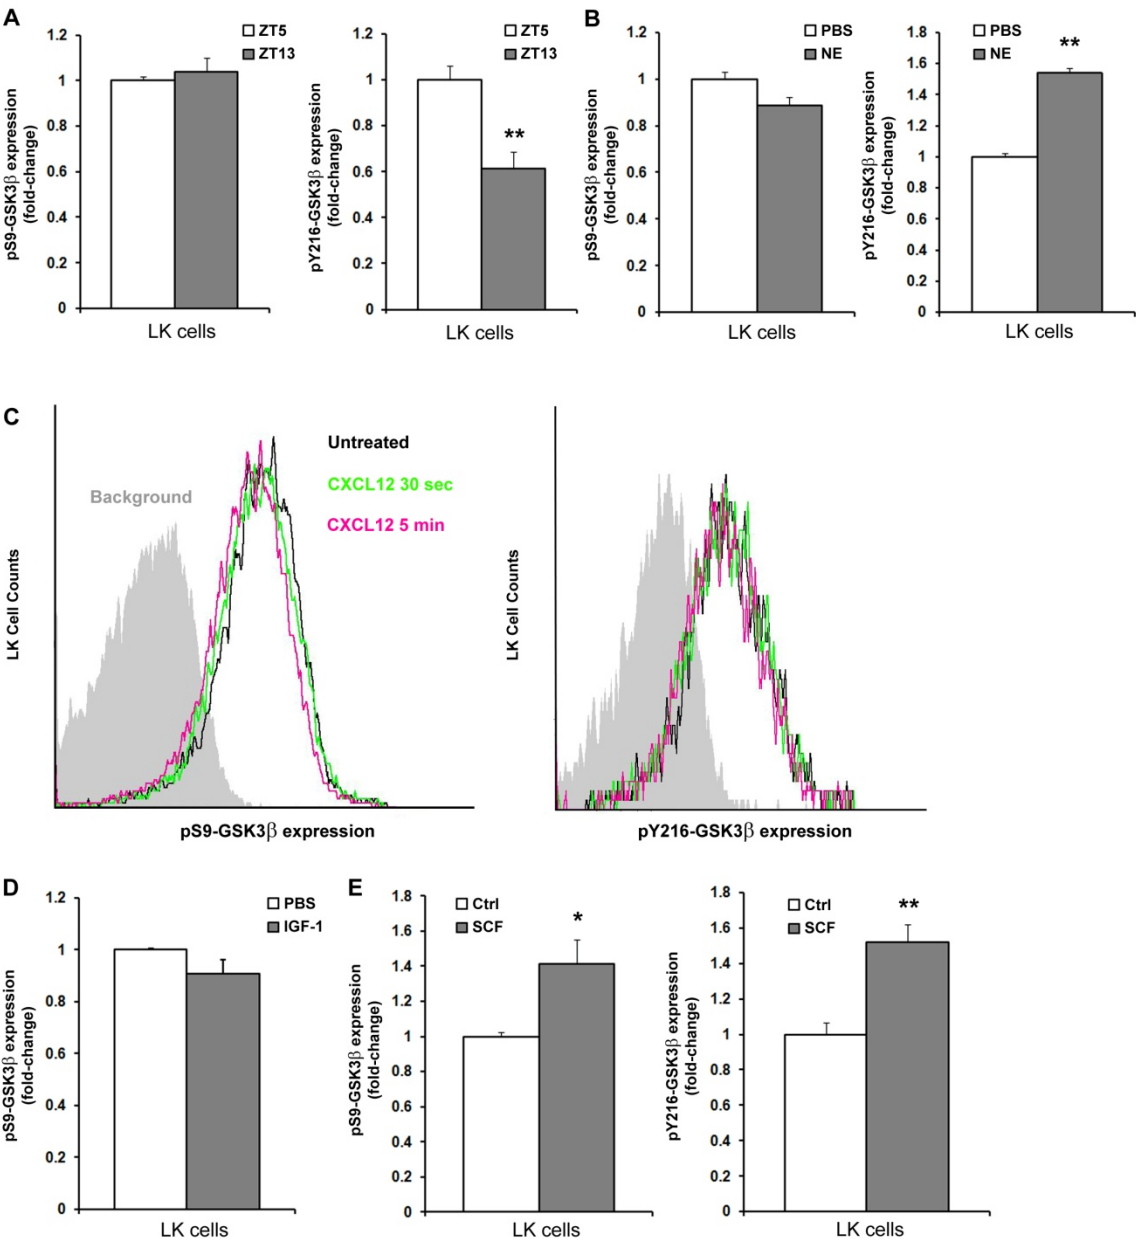

Supplementary Figure 3

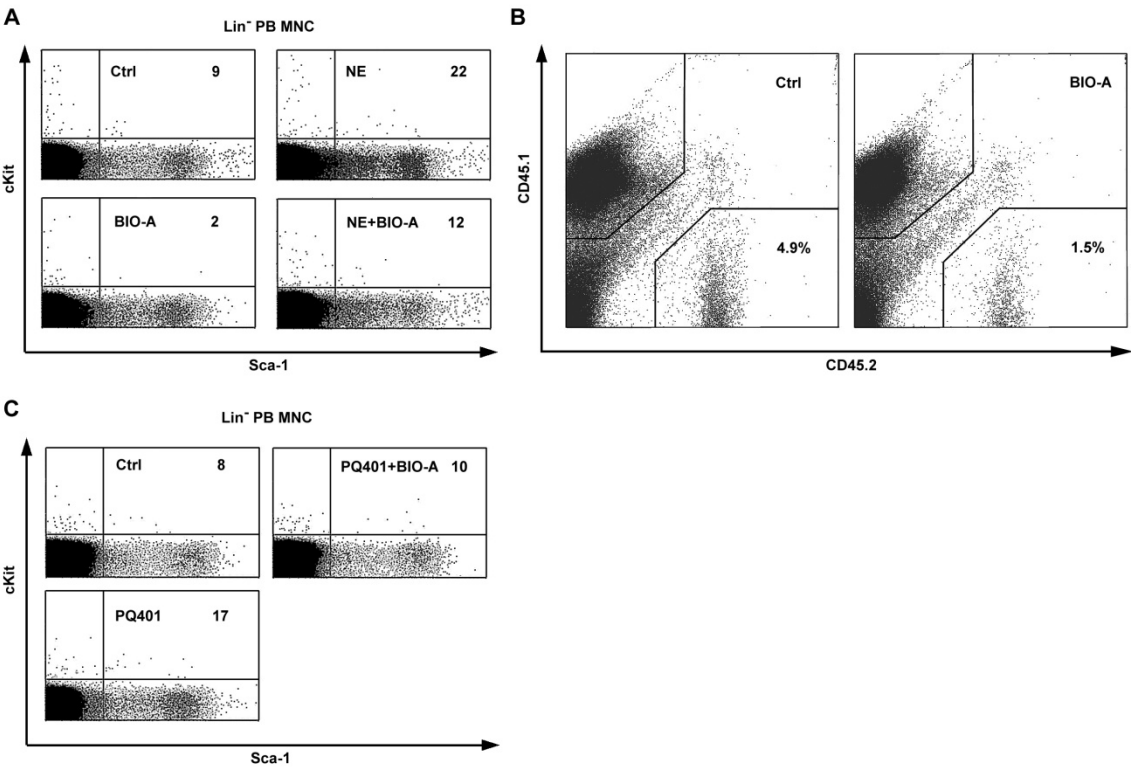

## Supplementary Figure 4

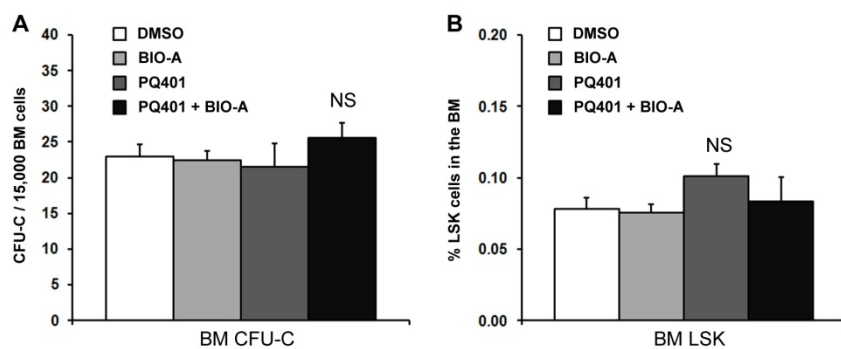

## Supplementary Figure 5

Out of Lin<sup>-</sup> cells:

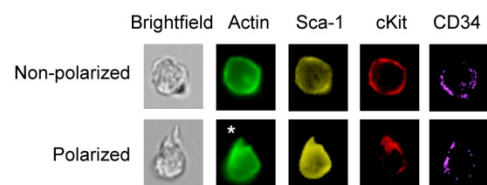

Supplement: sd1 [file 1]
